# Supplementary material
Source: publisher figshare collection journal article supplement (https://sage.figshare.com/ndownloader/files/13124732)

**Supplemental material: A single ESS-session: the difference between high-dose and low-dose ESS**

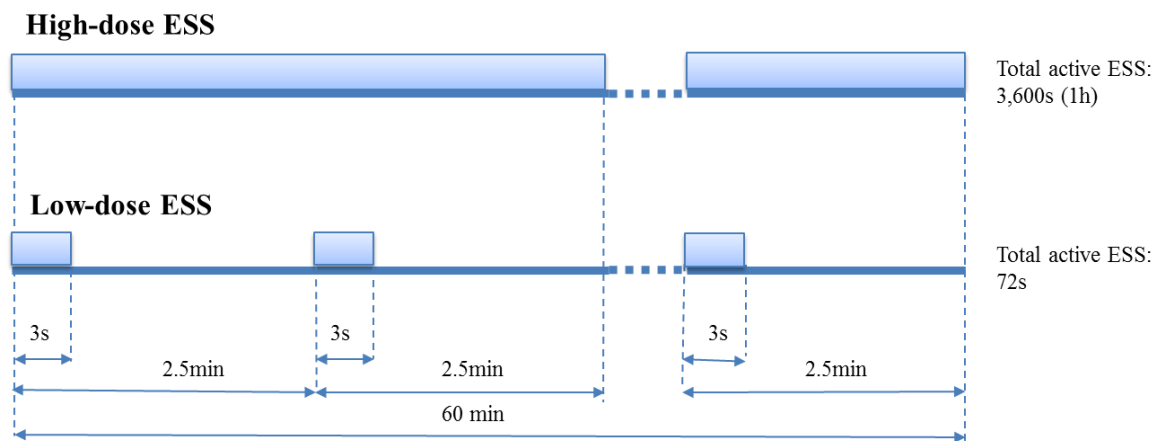

Supplement: Supplementary file 1 [file 13124732]
